# Supplementary material for: Development of immunoliposomes containing cytotoxic gold payloads against HER2-positive breast cancers
Source: Royal Society of Chemistry journal article supplement (doi:10.1039/d3md00334e), 2023-11-21
Supplement: d3md00334e1.pdf [file d3md00334e1.pdf]

## Supplementary Information

# Development of Immunoliposomes Containing Cytotoxic Gold Payloads Against HER2-Positive Breast Cancers

Afruja Ahad,<sup>a-c,f</sup> Fatima Aftab,<sup>a,b</sup> Alexa Michel,<sup>f</sup> Jason S. Lewis,<sup>f,h\*</sup> Maria Contel<sup>a-e\*</sup>

<sup>a</sup>Department of Chemistry, and <sup>b</sup>Brooklyn College Cancer Center, Brooklyn College, The City University of New York, Brooklyn, NY, USA. <sup>c</sup>Biology, <sup>d</sup>Chemistry, and <sup>e</sup>Biochemistry PhD Programs, The Graduate Center, The City University of New York, New York, NY, USA. <sup>f</sup>Radiology, <sup>g</sup>Molecular Pharmacology Program, and <sup>h</sup>Radiochemistry and Molecular Imaging Probes Core, Memorial Sloan Kettering Cancer Center, New York, NY, USA.

## Table of Contents

|                                                                                                       |    |
|-------------------------------------------------------------------------------------------------------|----|
| S1. Structures of gold(I) complexes                                                                   |    |
| Figure S1: Structures of <b>1</b> , <b>2</b> , and <b>3</b>                                           | 3  |
| S2. Dynamic light scatter                                                                             |    |
| Figure S2: Measurements of liposome size                                                              | 4  |
| S3. Engraftment                                                                                       |    |
| Figure S3: SDS-PAGE gel                                                                               | 5  |
| S4. Stability assays                                                                                  |    |
| Figure S4: Encapsulation efficiency and size                                                          | 6  |
| S5. Optimized immunoliposomes                                                                         |    |
| Figure S5: Measurements of optimized liposome size                                                    | 7  |
| Figure S6: TEM images of Opt-Lipo-2 and Opt-Immunolipo-Tras-2                                         | 8  |
| S6. Encapsulation of [AuCl(PPh <sub>2</sub> -BODIPY)]                                                 |    |
| Table S1: Characteristics of optimized immunoliposomes                                                | 9  |
| Figure S7: Size measurements of liposomes and immunoliposomes encapsulating <b>3</b>                  | 10 |
| Figure S8: TEM images of liposomes and immunoliposomes encapsulating [AuCl(PPh <sub>2</sub> -BODIPY)] | 11 |
| Figure S8: Binding affinity, drug release and IC <sub>50</sub>                                        | 12 |
| Figure S9: Confocal microscopy images of organelle uptake with [AuCl(PPh <sub>2</sub> -BODIPY)]       | 13 |

## S1: Structures of gold(I) Complexes

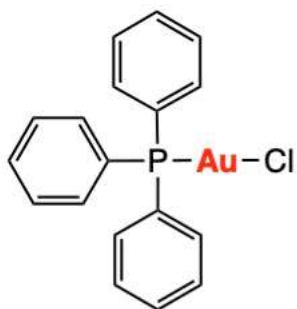

**1**

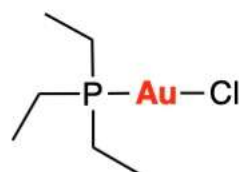

**2**

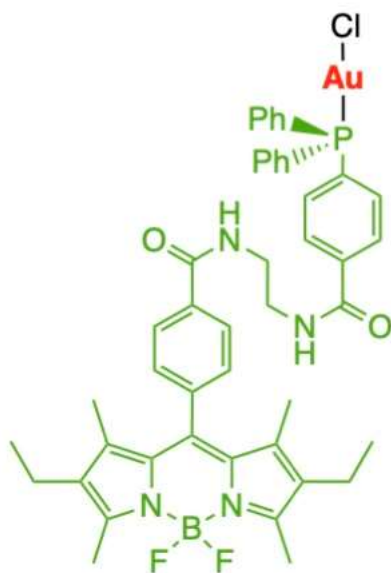

**3**

**Figure S1:** Structure of gold(I) phosphane-containing payloads  $[\text{AuCl}(\text{PPh}_3)]$  (1),  $[\text{AuCl}(\text{PEt}_3)]$  (2),  $[\text{AuCl}(\text{PPh}_2\text{-BODIPY})]$  (3) encapsulated into immunoliposomes.

**S2: Dynamic light scatter**

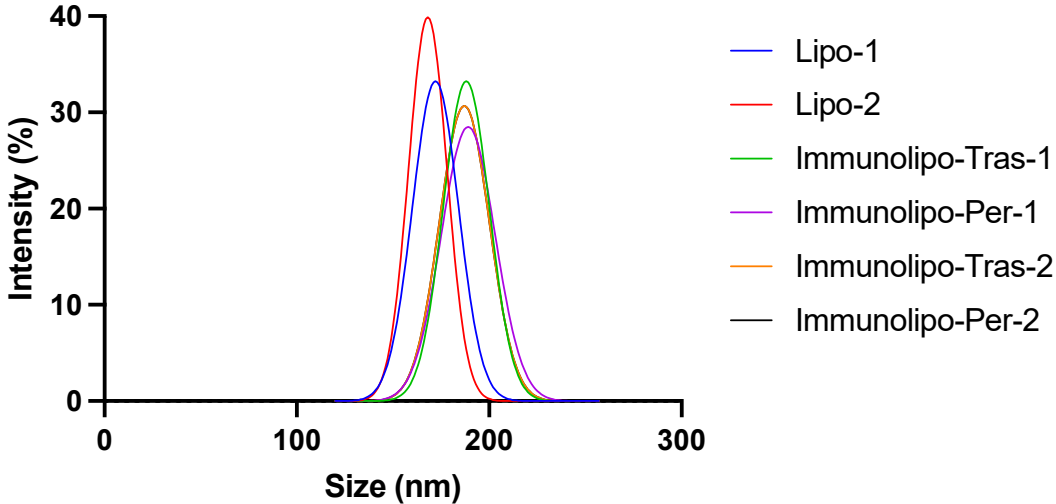

**Figure S2:** Measurements of liposome and immunoliposome size by DLS.

### S3. Engraftment

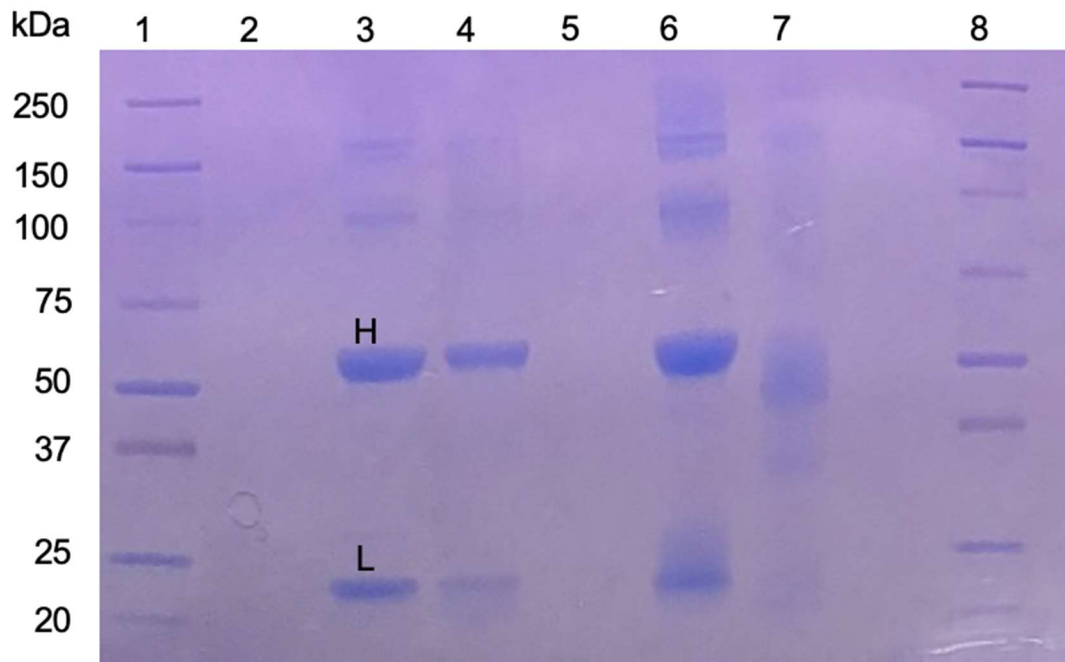

**Figure S3.** Representative SDS-PAGE gel of antibody engraftment on liposome surface. Protein markers (L1 and L8), Lipo-1 (L2), reduced Trastuzumab (thiolation by Traut's reagent) indicating heavy (H) and light (L) chains (L3), Immunolipo-Tras-1 in identical bands indicating presence of antibody (L4), antibody-free liposomes (L5), reduced Pertuzumab again indicating heavy and light chains (L6), Immunolipo-Per-1 (L7).

## S4. Stability assays

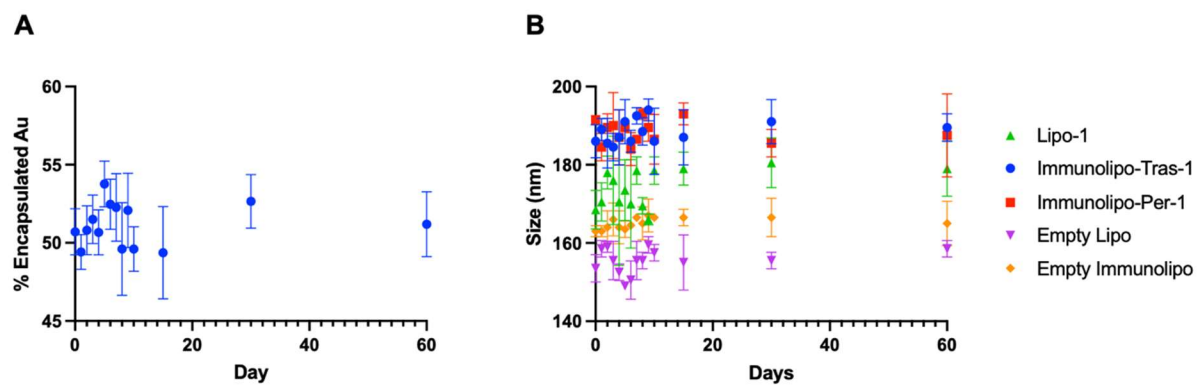

**Figure S4.** (A) Encapsulation efficiency of liposomal [AuCl(PPh<sub>3</sub>)] (**1**) over 60 days with storage in PBS in 4°C. (B) Stability of size of liposomes and immunoliposomes over 60 days.

**S5. Optimized immunoliposomes**

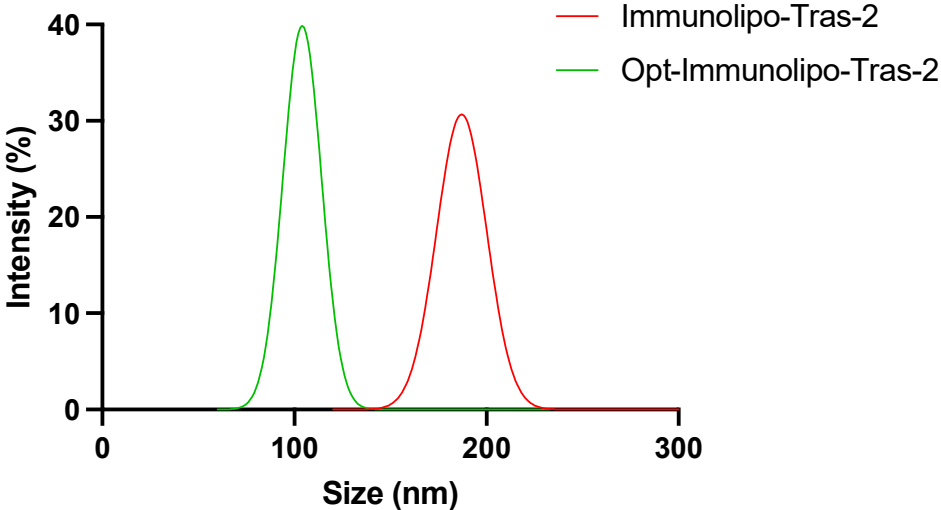

**Figure S5:** Measurements of larger and optimized immunoliposome size by DSL.

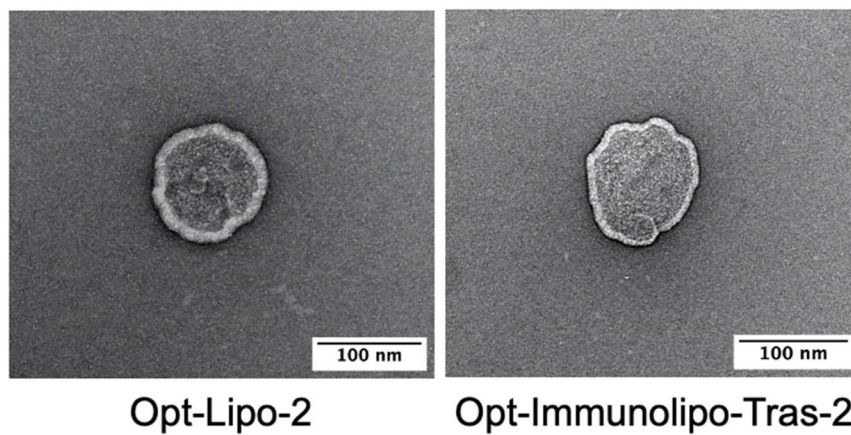

**Figure S6.** TEM images of reduced size liposome (left) or immunoliposome (right) encapsulating  $[\text{AuCl}(\text{PET}_3)]$  (**2**) following uranyl acetate staining. Scale bar indicates size of liposomes to be ~100 nm in diameter. 150,000-200,000x magnification.



## S6. Encapsulation of [AuCl(PPh<sub>2</sub>-BODIPY)]

**Table S1.** Properties of liposomes and immunoliposomes encapsulating [AuCl(PPh<sub>2</sub>-BODIPY)] (3). Stability measurements of size, Pdl, Zeta potential, encapsulation and engraftment remain unchanged in storage in PBS at 4°C for up to 60 days.

|                          | <b>Lipo-3</b>          | <b>Immunolipo-Tras-3</b> | <b>Opt-Immunolipo-Tras-3</b> |
|--------------------------|------------------------|--------------------------|------------------------------|
| Size                     | 172 ± 9                | 188 ± 7                  | 105 ± 9                      |
| Polydispersity Index     | 0.1                    | 0.1                      | 0.05                         |
| Zeta Potential           | neutral                | neutral                  | neutral                      |
| Concentration            | 9.4 x 10 <sup>10</sup> | 1.2 x 10 <sup>9</sup>    | 6.4 x 10 <sup>7</sup>        |
| Encapsulation Efficiency | 30%                    | 35%                      | 32%                          |
| Engraftment Efficiency   | -                      | 30%                      | 31%                          |

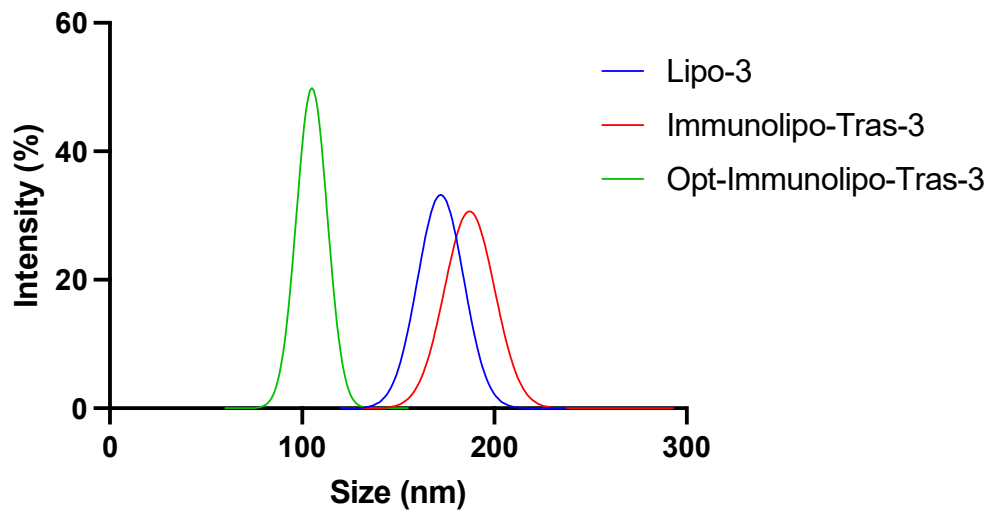

**Figure S7.** Size measurements of liposomes and immunoliposomes encapsulating **3** by DLS.

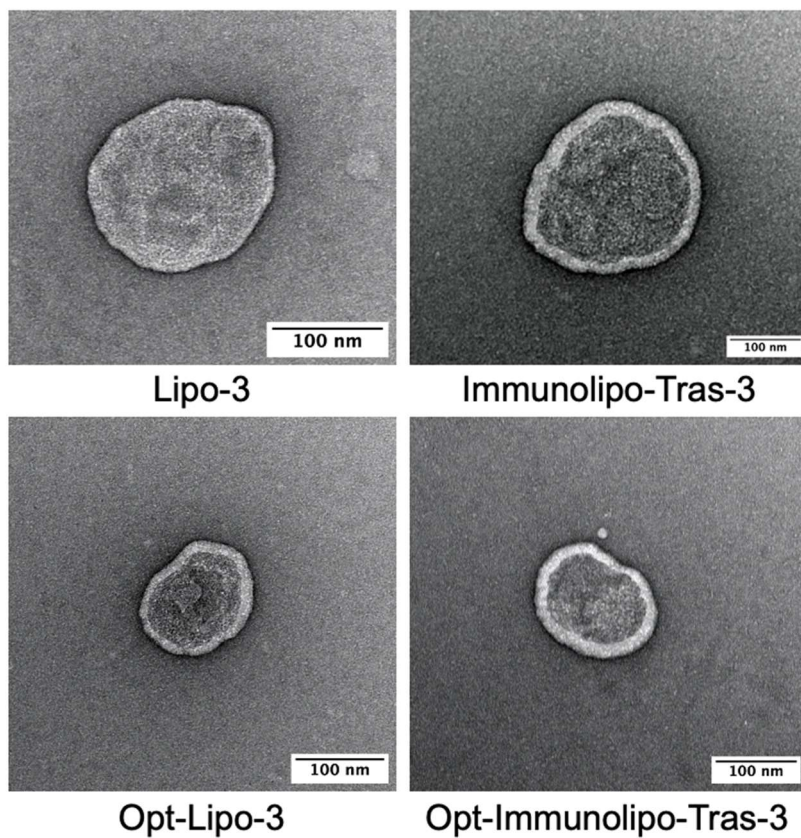

**Figure S8.** TEM images of liposomes or immunoliposomes encapsulating [AuCl(PPh<sub>2</sub>-BODIPY) (**3**) following uranyl acetate staining. Top left: 200 nm liposomes encapsulating **3**, top right: 200 nm immunoliposomes encapsulating **3**, bottom left: 100 nm liposomes encapsulating **3**, bottom right: 100 nm immunoliposomes encapsulating **3**. 150,000-200,000x magnification.

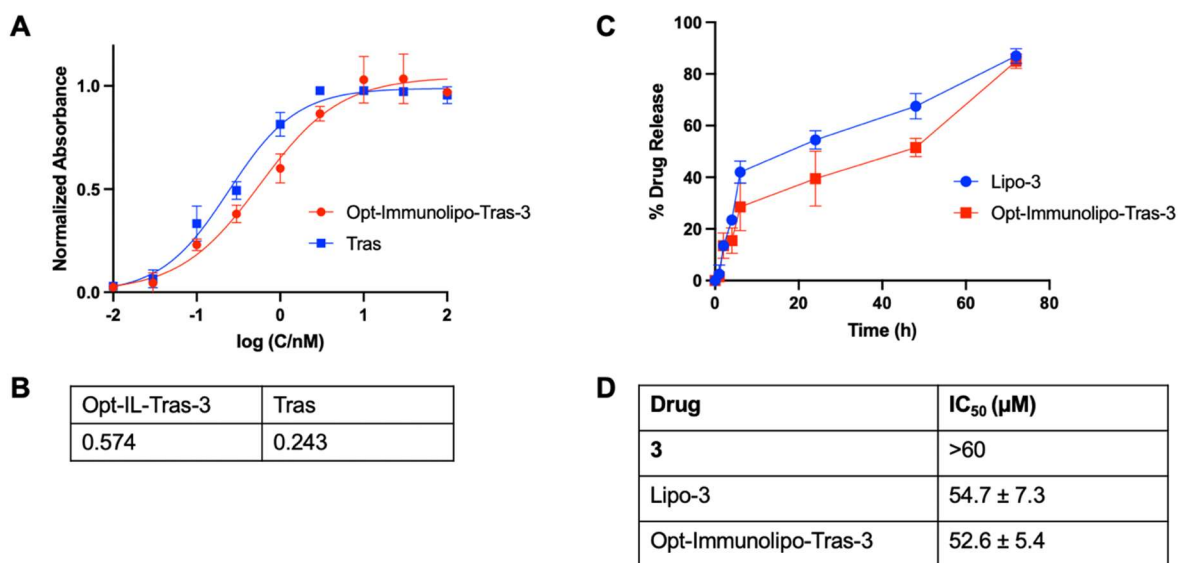

**Figure S9.** (A) ELISA binding affinity assay between free antibodies and immunoliposomes to HER2. 2.5h incubation on pre-coated HER2 plate followed by colorimetric quantification of TMB substrate. Abs measured at 450 nm. (B) EC<sub>50</sub> quantification from ELISA. IL: immunoliposome. (C) Drug release of [AuCl(PPh<sub>2</sub>-BODIPY)] (**3**), from liposomes vs. Trastuzumab-engrafted immunoliposomes in human serum at 37°C for up to 72 hours. Comparable drug release for both with 87% released for **Lipo-3** and 85% for **Opt-Immunolipo-Tras-3**. (D) IC<sub>50</sub> values in cell line BT-474 for **3**, **Lipo-3** and **Opt-Immunolipo-Tras-3**.

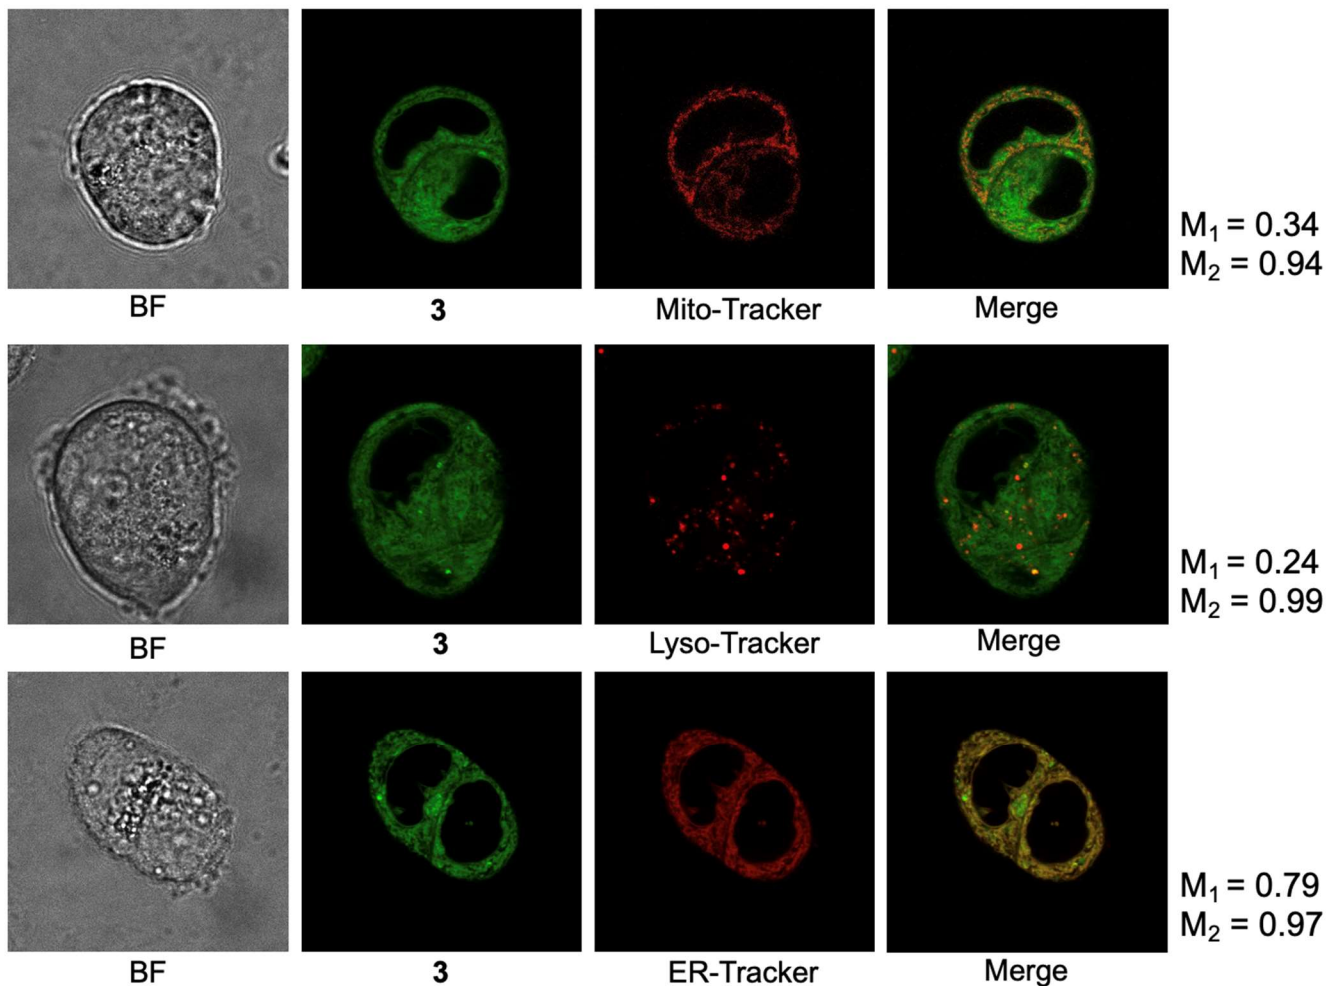

**Figure S10.** Confocal microscopy images of live BT-474 cells treated with **3** (IC<sub>10</sub>) and MitoTracker Red FM (top), LysoTracker Red DND-99 (middle), and ER-Tracker Red (bottom). The image overlay (Merge, right) of both fluorescent channels shows the colocalization of **3** and organelle trackers. Manders' colocalization coefficient  $M_1$  reflects the fraction of total signal emitted by **3** that overlaps with the organelle tracker, and  $M_2$  reflects the fraction of the total signal emitted by the organelle tracker that overlaps with that of
